# Supplementary material
Source: PubMed Central journal article supplement (PMC3084120)
Supplement: 1013634108_pnas.201013634SI.pdf [file 1013634108_pnas.201013634SI.pdf]

# Supporting Information

Miyamoto et al. 10.1073/pnas.1013634108

## SI Materials and Methods

**Proteomic Analysis.** Total protein concentrations were determined by the modified Bradford-HCl assay using  $\gamma$ -globulin as a standard and aligned among all samples. Separation of proteins by first-dimensional IEF electrophoresis was performed using IPG gels (Immobiline DryStrip, pH 3–11 NL; GE Healthcare). The strips were transferred onto SDS/PAGE gels. After the 2D PAGE, gels were stained with Sypro Ruby (Invitrogen). Differentially expressed spots were picked up manually and subjected to in-gel trypsin digestion. MS spectrometric analysis of the tryptic digests was performed using a 4700 MALDI-TOF/TOF mass spectrometer (Applied Biosystems). To identify proteins, sets of MS and MS/MS spectra were subjected to MS/MS Ion search (Matrix Science) against the Swiss Prot or the National Center for Biotechnology Information mammalian protein database.

**Embryo Manipulation.** Porcine nuclear transfer was performed as described previously (1). Porcine fibroblast cells from an adult male Meishan pig were cultured in DMEM with 10% FBS and used for donor cells within passage 8. Five picoliters of antibody solution or 10 pL of 500 ng/ $\mu$ L poly(A)-tailed RNA was injected into enucleated oocytes. After injection of antibody, embryos were kept for at least 1 h before fusion with donor cells, which allows the antibody to bind endogenous DJ-1. The total number of cleaved embryos was judged 48 h after nuclear transfer. Porcine ICSI followed the previous protocol (2) and the antibody was injected at least 1 h before sperm injection. Antibodies used are as follows: DJ-1 (sc-27004; Santa Cruz), rabbit IgG (sc-2027; Santa Cruz), and goat IgG (sc-2028; Santa Cruz).

**Gene Expression Analyses.** Incorporation of DJ-1 protein into extract-treated nuclei and distribution of DJ-1 protein in oocytes and embryos were examined by immunofluorescence analysis. The following antibody was used: DJ-1 (sc-27004). Anti-goat secondary antibody conjugated with Alexa488 (Invitrogen) was used. Nuclei were stained with propidium iodide. The amounts of

proteins expressed in cells, oocytes, and embryos were measured by Western blotting. The following primary antibodies were used: DJ-1 (sc-27004), P53 (628201; Biolegend), P53(S20) [DR1023 (Calbiochem) or 55427 (ANASPEC)], Histone H2B (07-371; Millipore),  $\beta$ -Actin (clone AC15; Sigma), and Tubulin (T9026; Sigma). Anti-Tubulin, anti-Histone H2B, and anti- $\beta$ -Actin antibodies were used for standardization. The blots were visualized using Immobilon Western HRP Substrate (Millipore). The amounts of transcripts expressed were measured by RT-PCR analysis. Total RNA from cells or from oocytes and embryos was extracted by a phenol-chloroform method or by a Picopure RNA extraction kit (Arcturus), respectively. Purified RNA was reverse transcribed by ReverTra Ace (TOYOBO) and PCR was performed by ExTaq (Takara) or KOD plus. Primers used are listed in Table S2. In both analyses, the band intensities were determined by a model 4.0 ATTO densitograph.

**Microarray Analysis.** Nuclear transfer embryos (23–26 embryos per each sample) were collected 28 h after nuclear transfer. Total RNA was purified by the use of a Picopure RNA extraction kit. Two rounds of amplification for isolated RNA were performed for microarray analysis (3). The final yield of biotinylated cRNA was hybridized to the Affymetrix GeneChip Porcine Genome Array. The output data were analyzed with GeneSpring software (Agilent).

**Plasmid Construction, RNA Synthesis, and Transfection.** Site-directed mutagenesis was induced by different primer sets containing a point mutation (Table S2) to generate constructed plasmids containing pig DJ1(L166P) cDNA. The plasmids were used as templates for in vitro transcription. RNA synthesis and poly(A) tailing were performed with a MEGAscript T7 kit (Ambion). Antisense oligonucleotide and siRNA against porcine DJ-1 were designed and the sequences are listed in Table S2. DJ-1 siRNA was transfected to fibroblast cells using Lipofectamine 2000 (Invitrogen) according to the vendor's instructions.

1. Miyamoto K, Hoshino Y, Minami N, Yamada M, Imai H (2007) Effects of synchronization of donor cell cycle on embryonic development and DNA synthesis in porcine nuclear transfer embryos. *J Reprod Dev* 53:237–246.
2. Binh NT, Van Thuan N, Miyake M (2009) Effects of liquid preservation of sperm on their ability to activate oocytes and initiate preimplantational development after intracytoplasmic sperm injection in the pig. *Theriogenology* 71:1440–1450.

3. Vassena R, et al. (2007) Tough beginnings: Alterations in the transcriptome of cloned embryos during the first two cell cycles. *Dev Biol* 304:75–89.



**A**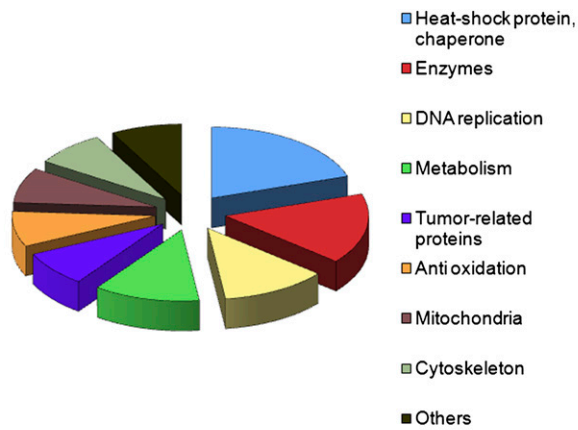**B**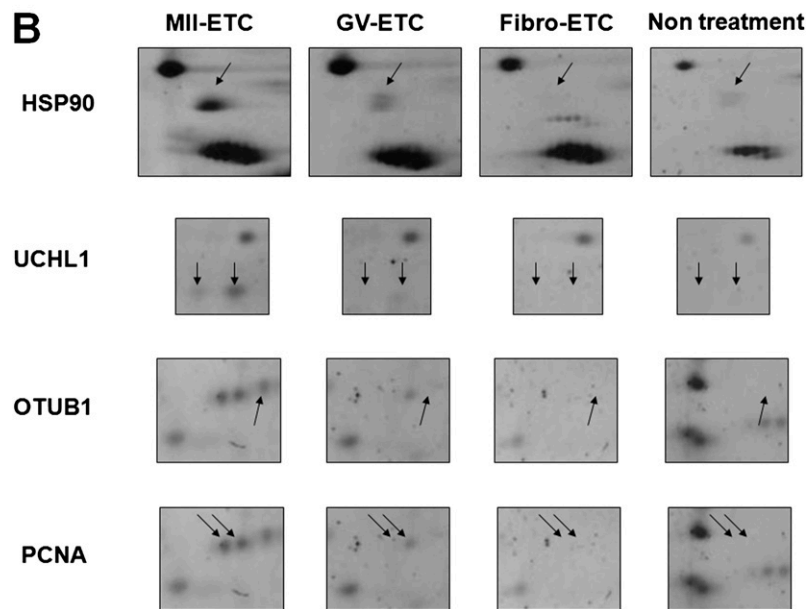

**Fig. S3.** Oocyte proteins that are specifically and abundantly accumulated in somatic nuclei after treatment with MII oocyte extracts. (A) Identified proteins are classified according to their cellular function. (B) Some examples of proteins that are highly expressed in MII oocyte extract-treated cells (MI-EXT). Protein spots are indicated by arrows. GV-EXT, GV oocyte extract-treated cells; Fibro-EXT, fibroblast extract-treated cells; Non treatment, cells before extract treatment.
